# Supplementary material
Source: publisher figshare collection journal article supplement (https://frontiersin.figshare.com/ndownloader/files/31556756)
Supplement: Supplementary file [file 31556756]

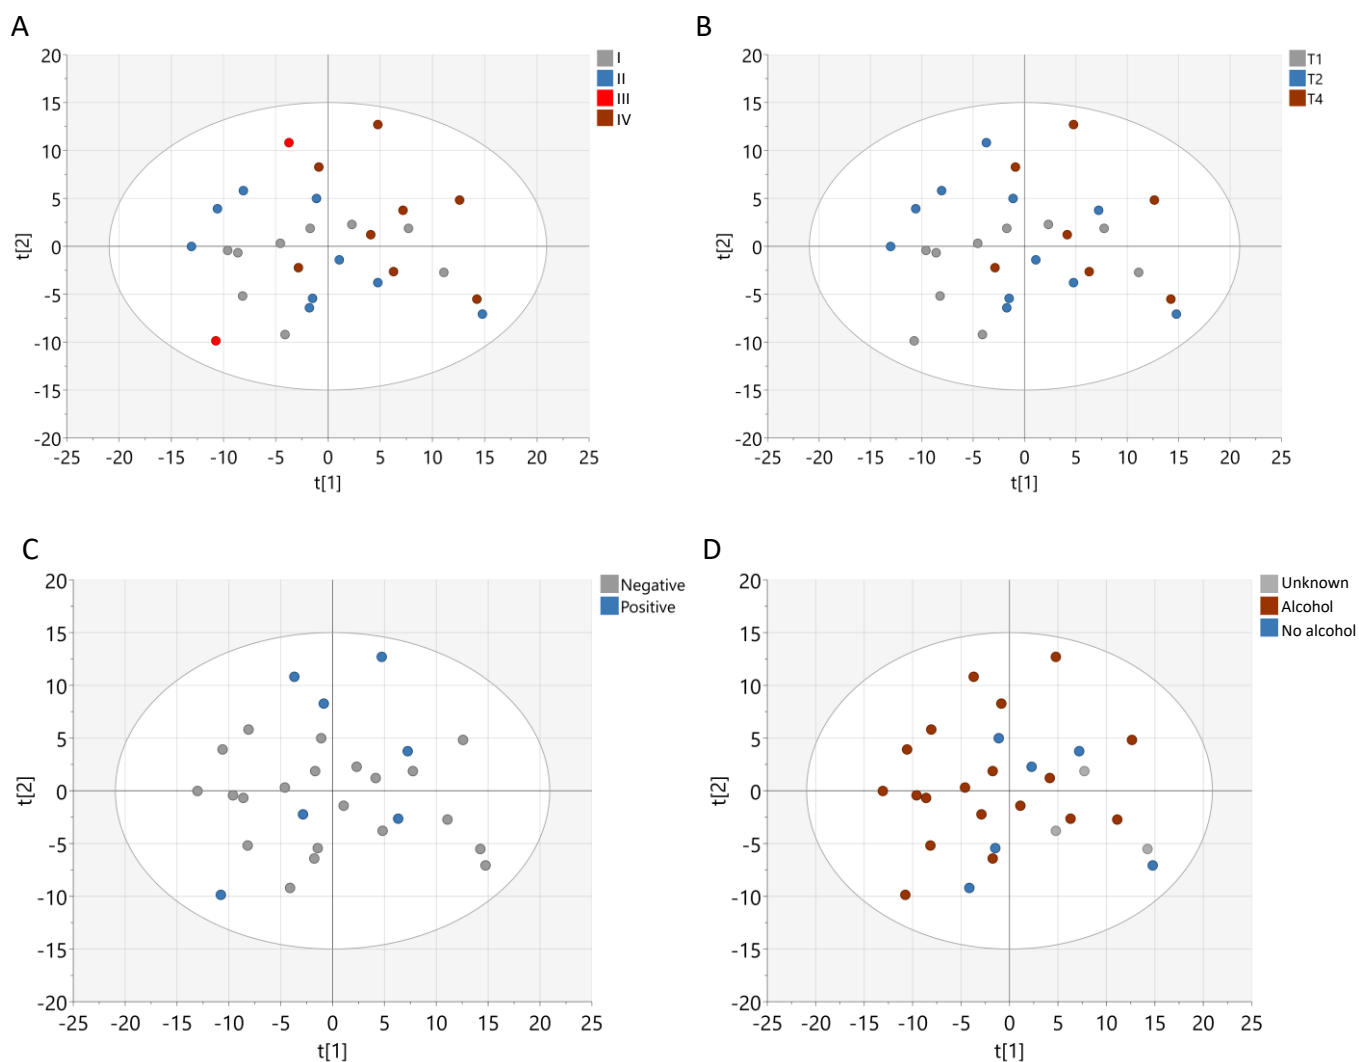

**Figure S1.** PCA plots visualizing protein expression profiles in plasma samples at diagnosis (Two components,  $R^2= 0.363$ ,  $Q^2= 0.227$ ). Samples are colored according to TNM stage (A), T stage (B), node status (C) and alcohol consumption status (D).
